# Shared Brain Lateralization Patterns in Language and Acheulean Stone Tool Production: A Functional Transcranial Doppler Ultrasound Study

Natalie Thaïs Uomini<sup>1</sup>, Georg Friedrich Meyer<sup>2\*</sup>

<sup>1</sup> Department of Archaeology, Classics and Egyptology, University of Liverpool, Liverpool, United Kingdom, <sup>2</sup> Department of Experimental Psychology, University of Liverpool, Liverpool, United Kingdom

## Abstract

**Background:** The popular theory that complex tool-making and language co-evolved in the human lineage rests on the hypothesis that both skills share underlying brain processes and systems. However, language and stone tool-making have so far only been studied separately using a range of neuroimaging techniques and diverse paradigms.

**Methodology/Principal Findings:** We present the first-ever study of brain activation that directly compares active Acheulean tool-making and language. Using functional transcranial Doppler ultrasonography (fTCD), we measured brain blood flow lateralization patterns (hemodynamics) in subjects who performed two tasks designed to isolate the planning component of Acheulean stone tool-making and cued word generation as a language task. We show highly correlated hemodynamics in the initial 10 seconds of task execution.

**Conclusions/Significance:** Stone tool-making and cued word generation cause common cerebral blood flow lateralization signatures in our participants. This is consistent with a shared neural substrate for prehistoric stone tool-making and language, and is compatible with language evolution theories that posit a co-evolution of language and manual praxis. In turn, our results support the hypothesis that aspects of language might have emerged as early as 1.75 million years ago, with the start of Acheulean technology.

**Citation:** Uomini NT, Meyer GF (2013) Shared Brain Lateralization Patterns in Language and Acheulean Stone Tool Production: A Functional Transcranial Doppler Ultrasound Study. PLoS ONE 8(8): e72693. doi:10.1371/journal.pone.0072693

**Editor:** Michael D. Petraglia, University of Oxford, United Kingdom

**Received:** May 17, 2013; **Accepted:** July 12, 2013; **Published:** August 30, 2013

**Copyright:** © 2013 Meyer, Uomini. This is an open-access article distributed under the terms of the Creative Commons Attribution License, which permits unrestricted use, distribution, and reproduction in any medium, provided the original author and source are credited.

**Funding:** This work was partially supported by an ESRC award (North West DTC ES/J500094/1). N. Uomini was supported by a postdoctoral fellowship from the British Academy centenary project "Lucy to Language: the Archaeology of the Social Brain" and a Leverhulme Early Career Fellowship number 0298. The funders had no role in study design, data collection and analysis, decision to publish, or preparation of the manuscript.

**Competing Interests:** The authors have declared that no competing interests exist.

\* E-mail: georg@liv.ac.uk

## Introduction

Complex tool-making and language are two areas that set humans apart from other animals [1]. The emergence of unique toolkits based on the physical effects of striking two stones together occurred by c. 2.5 Mya (million years) ago [2,3], or possibly even earlier [4]. In contrast, estimates for the emergence of language range from *Homo erectus/ergaster* [5] at 1.89 Mya to Upper Palaeolithic modern humans [6] at 50,000 years ago. The crucial question under debate is to what extent the evolution of stone tool-making capacities and linguistic capacities were aligned [7,8]. The popular theory that both skills co-evolved in the human lineage [9–11] rests on the hypothesis that both skills share underlying processes and neural systems, but there is little empirical evidence for this [12]. Direct evidence that both skills draw on common brain areas or result in common brain activation patterns would provide compelling support for this argument.

Language and stone tool-making have so far only been studied separately using a range of neuroimaging techniques and diverse paradigms [13]. Both share conceptual similarities, such as the need for structured and hierarchical action plans [9,14,15] to be successfully executed. There is considerable co-development of

tool-use and language in human children [1,10]. Language dominance predicts the laterality of temporal and spatial movement representations in ideomotor praxis: the ability to imagine or act out motor actions that rely on semantic memory [16]. Most importantly, there is a potential for substantial overlap in the neural circuits activated during tool-use [17,18] and language [19], including action planning and action observation [20].

Figure 1 shows a schematic diagram of the broad fronto-parietal brain areas that have been implicated in a range of language and action observation, planning and execution tasks [21–23]. Previous work has shown that speech (S in Figure 1) and action (A) observation draw on shared networks identified by [20] that are simultaneously activated [24]. Similarly, Acheulean stone tool-making (knapping, K, [23]), and planning tool-use actions (T, [25]) have been reported to activate similar anatomical brain areas. These areas are also used during cued word generation (W, [26]). Some brain areas, notably regions in the posterior temporal cortex (PTC) are selectively involved in observational tasks (S, A), while the fronto-parietal network is active during execution and observation.

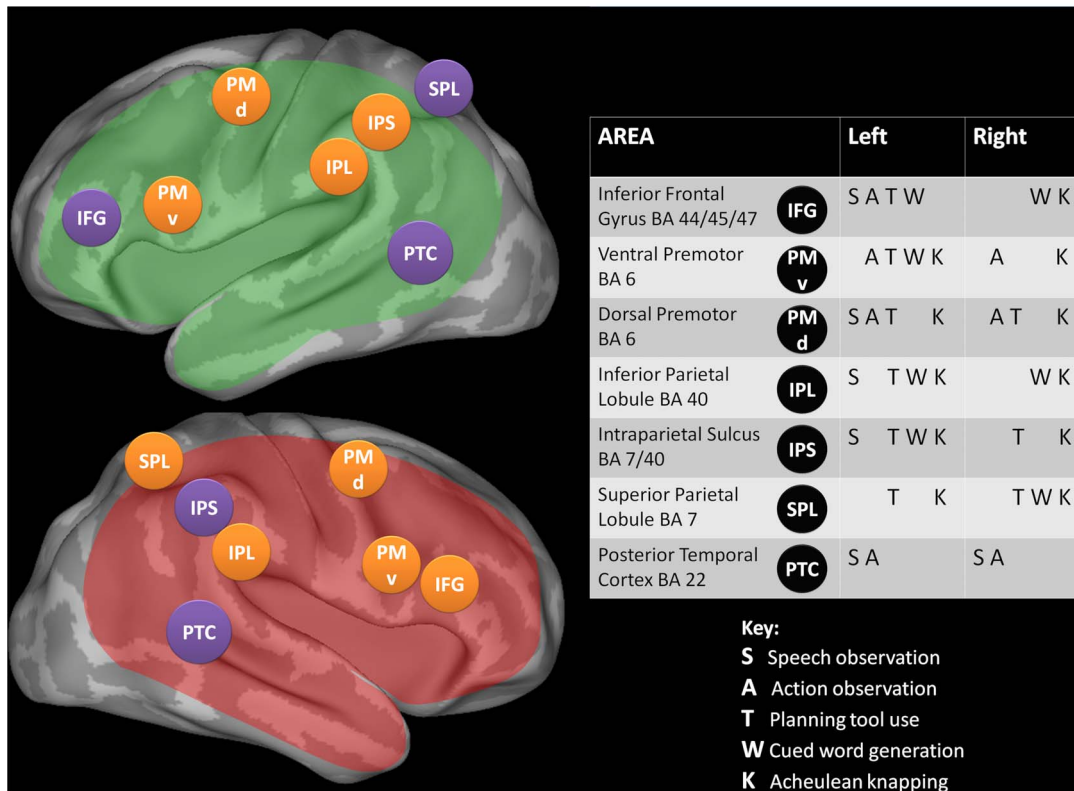

**Figure 1. Brain regions activated during speech and action observation, tool-use, word generation, and Acheulean knapping.** S= speech observation, A= action observation, T= planning tool use, W= word generation, K= Acheulean knapping. The table shows potential overlap in the neural networks used in all five tasks. The posterior temporal cortex is used exclusively for observation. Fronto-parietal brain areas activated by both cued word generation *and* knapping are highlighted in orange. Cortical areas supplied by the MCA (middle cerebral artery) are highlighted in green (left hemisphere) and red (right hemisphere). doi:10.1371/journal.pone.0072693.g001

Because all of these findings derive from separate studies using disparate methodologies, they identify broad areas that do not necessarily overlap within individual participants. The key question is whether the overlap is functionally relevant. The objective of the present study was to directly compare real-time brain activation patterns for language and stone tool-making (knapping) within one group of participants, using one single neuroimaging technique and experimental paradigm.

We selected Acheulean knapping (K in Figure 1) as the tool-making task and cued word generation (W in Figure 1) as the language task because previous independent studies identified activation for these tasks in overlapping bilateral parietal and frontal cortical sites, marked in orange in Figure 1. The cued word generation task is widely used in clinical language lateralization assessment and provides a well-established set of benchmark data against which to validate our results [27–29]. Furthermore, brain activation patterns during stone knapping [23] suggest relatively higher cognitive demands when making Acheulean bifaces compared to Oldowan flakes. Acheulean knapping requires increased visuomotor coordination and hierarchical action organization [30]. The emergence of the Acheulean techno-complex points to a change in the cognitive capabilities for making stone tools before 1 Mya. The extensively worked Acheulean handaxes mark an increased complexity of technological production from Oldowan flaking [12,31,32], with longer sequences and sub-sequences of stone tool shaping to achieve a more refined product.

We employ functional transcranial Doppler ultrasonography (fTCD). For a good review of fTCD, see [33]. This portable, non-

invasive technique uses Doppler ultrasound to measure blood flow velocity changes in the right and left middle cerebral arteries (MCAs) during language and stone tool production. The MCAs supply the majority of the lateral surface of each cortical hemisphere with the exception of the most superior sections of the frontal and parietal lobes, the occipital cortex, and the inferior part of the temporal lobe [34], as indicated by the areas shaded red (right) and green (left) in Figure 1. The activation of brain areas supplied by the MCA, such as the network shown in Figure 1, causes intra-cranial blood flow velocity (CBFV) changes.

In contrast to most other neuroimaging methods, such as fMRI, which is standard for language tasks, fTCD is not vulnerable to participant motion, so that the vigorous physical action of stone knapping is possible. In contrast to PET (positron emission tomography), which has been used to study stone knapping [35], fTCD offers sufficient temporal resolution to measure rapid changes in cerebral blood flow patterns. The equipment is small and portable. fTCD is thus ideally suited for combining real-time tasks such as language with tasks such as stone knapping which involve subject motion and recording outside the laboratory.

The fTCD technique has been used for language neuroimaging since 1998, providing well-documented and highly replicable baseline results [36,37], in particular for language lateralization studies. fTCD measures of cerebral blood flow lateralization are highly correlated with alternative measures, for example the relative distribution of fMRI voxel counts in the left and right hemispheres for language tasks [26,38] and spatial attention tasks [39,40]. Sabri et al. [41] showed that simultaneously recorded

fTCD lateralization data were almost perfectly correlated with PET volume changes and volume-weighted perfusion changes in a (n-back) working memory task. Language lateralization data from fTCD have further been shown to correlate well with unilateral disruption of language functions via either the intracarotid sodium amobarbital procedure (Wada test [42]) or repetitive Transcranial Magnetic Stimulation (rTMS) [43]. The fTCD technique therefore provides reliable data that directly reflect the activation state of brain areas supplied by the artery under investigation.

The cued word generation task was chosen for this study because a wealth of comparison data from fTCD and other imaging methodologies exists for it; the CBFV changes we observe can therefore be directly compared with previous work. Bishop et al. [28] describe the task as the ‘gold standard’ and show highly correlated lateralization indices (LIs) for this task with those obtained for two other language tasks that rely more on syntactic processing: a picture description task and an animation description task, consistent with the view that all three tasks draw on substantially overlapping cortical networks.

Furthermore, a number of studies show that a range of visuo-spatial tasks lead to LIs that are *not* correlated with the standard cued word generation task: Rosch et al. [44] tested visuo-spatial attention, Whitehouse et al. [45] used a visual memory task, and Lust et al. [46] tested participants in a driving simulator. None of these studies found a correlation with cued word generation. Rosch et al. [44] also show that the LI correlation is not affected by task difficulty. These findings are relevant for this study because they mean that neither common attentional processes at the onset of two different tasks, nor obligatory contralateral brain organization for language and visuo-spatial processing, are plausible explanations for correlated brain blood flow changes.

If action planning for tool-making and language draw on shared functional brain structures, we predict that the individual hemodynamic modulation measures for the two tasks should be positively correlated. In other words, individuals who show highly lateralized rapid blood flow changes for language should show a similar response during stone knapping. Specifically, this correlation should occur in the initial planning phase of task execution. The first few seconds of cerebral hemodynamics have been shown to be a good predictor of complex behavior, such as performance in non-routine planning tasks [47].

## Materials and Methods

### Subjects

All participants were experienced stone knappers, recruited at a meeting of the UK Lithic Studies Society and from the Archaeology Department at the University of Liverpool. We report on data from 10 participants (3 female, age range 21–68, mean age 37.7 years). All were healthy and without a history of neurological disorder. Two male participants held the hammerstone in their left hand; all others knapped right-handed.

### Ethics Statement

The experiments were approved by the University of Liverpool ethics committee (reference PSYC-1011-025 - Georg Meyer - Action planning and cerebral blood flow lateralisation). Written informed consent was acquired from all participants. All participants depicted this paper have given written informed consent, as outlined in the PLOS consent form, to publication of their images.

### Apparatus and Materials

Figure 2 shows a photograph of a participant carrying out the knapping task, and a schematic diagram of the fTCD setup. Blood

flow velocity is simultaneously measured in both middle cerebral arteries (MCAs) using two headband mounted Doppler ultrasound probes [33]. Cerebral blood flow velocity (CBFV) in the right and left MCAs were continuously measured with a commercially available dual transcranial Doppler ultrasonography device (Multi-Dop T, DWL, Sipplingen, Germany). The MCAs were insonated at a depth of approximately 50 mm with two 2-MHz transducer probes attached to a headband and placed at the trans-temporal windows bilaterally [48]. The spectral envelope curves of the Doppler signals were recorded with a sample rate of 25 Hz.

### Experimental Conditions

We compare relative MCA blood flow velocity changes during two tasks designed to isolate the complex planning component of task execution: Acheulean handaxe production and silent cued word generation. In both experimental conditions, target intervals were alternated with control intervals. Following standard fTCD paradigms [28,49], the target intervals were 25–35 seconds (s) (avg. 30 s) in duration while the control conditions were 15–25 s (avg. 20 s) long. Twenty target/control epochs were presented in each experimental block. Stimulus presentation was controlled by a personal computer running the ShowPics software (v. 3.1.0) which was interfaced to the fTCD system to mark the start of each epoch.

The cued word generation task, as discussed above, is a standard language lateralization assessment task used in clinical settings [42]. Subjects were asked to silently generate words starting with a letter heard at the onset of the target interval. Target letters were presented in random order and no letter was presented more than once. For the control interval subjects were asked to sit quietly and rest. A beep and a spoken letter marked the onset of the target interval while an isolated beep indicated the start of the control interval.

In the knapping task, subjects were asked to produce or continue producing a “generic” Acheulean handaxe in the target interval. This included manipulating the core, preparing the platform, and removing flakes by striking the hammerstone against the flint core. For the control interval, subjects were asked to keep hold of the same hammerstone and strike a large granite cobble with roughly the same intensity and frequency as in the knapping interval, but without trying to produce flakes or alter the shape of the stone. The Video S1 shows an example of one participant’s action and control intervals. Our paradigm was designed to isolate the action planning component during the target interval while keeping other activity, such as motor or visual processing, constant in both intervals. Thus, the action intervals differed from the control intervals in that subjects had to plan the flaking sequence necessary to produce a handaxe form. Subjects continued working on the same handaxe over a succession of target intervals. A beep generated by the controlling computer signaled a change in the intervals. Each participant had a total of 9 minutes of knapping time over the whole experiment. Figure 3 shows a sample of handaxes that were created by our participants.

Subjects were provided with a stone tool blank consisting of a large flake removed from the original quarried flint nodules of Brandon flint. Subjects selected a hammerstone from granite river cobbles provided for the experiment. During the experiment subjects had to knap with the same hammerstone and piece of flint, except in case of breakage or reduction to an unusable size. Subjects were provided with protective equipment, the test room was adequately ventilated during knapping, and the floor was protected by a tarpaulin for proper disposal of all knapping waste.

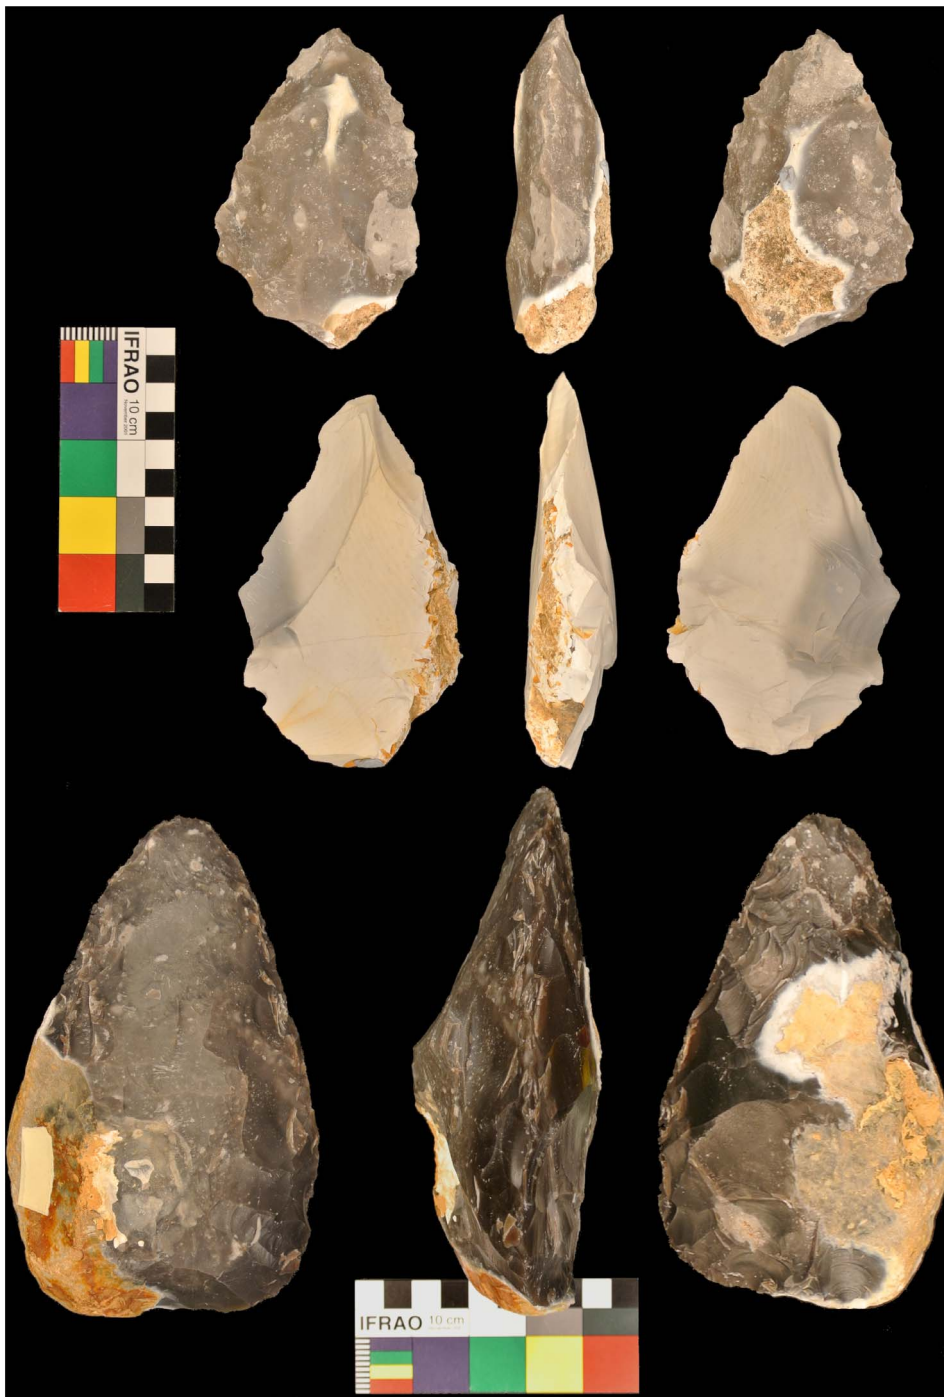

**Figure 2. fTCD recording during the knapping task.** A participant in our study carrying out the knapping task during fTCD recording. Two small, head-mounted probes measure cerebral blood flow velocities. The inset shows a diagram of the middle cerebral arteries that were insonated in our study.  
doi:10.1371/journal.pone.0072693.g002

### Data Analysis

The recordings were integrated over the corresponding cardiac cycles, segmented into epochs and then averaged off-line using the AVERAGE V1.85 software [49]. Trials with physiologically implausible CBFV changes relative to baseline of  $\pm 30\%$  were excluded from the analysis. Subjects with less than 80% ‘good’ epochs in any one of the conditions were excluded from the data analysis (three of 13 subjects) to ensure data integrity. The average

responses were filtered off-line using a second order zero-phase lag Butterworth low-pass filter with a cut-off frequency of 1 Hz.

All CBFV changes are computed relative to a baseline that was the average of the five seconds of the control period immediately preceding the target epoch onset. Group statistics were computed using purpose-designed MATLAB (The Mathworks, Natick, MA) scripts. The relative cerebral blood flow velocity  $\Delta V(t)$  is the difference between left and right hemisphere blood flow velocity

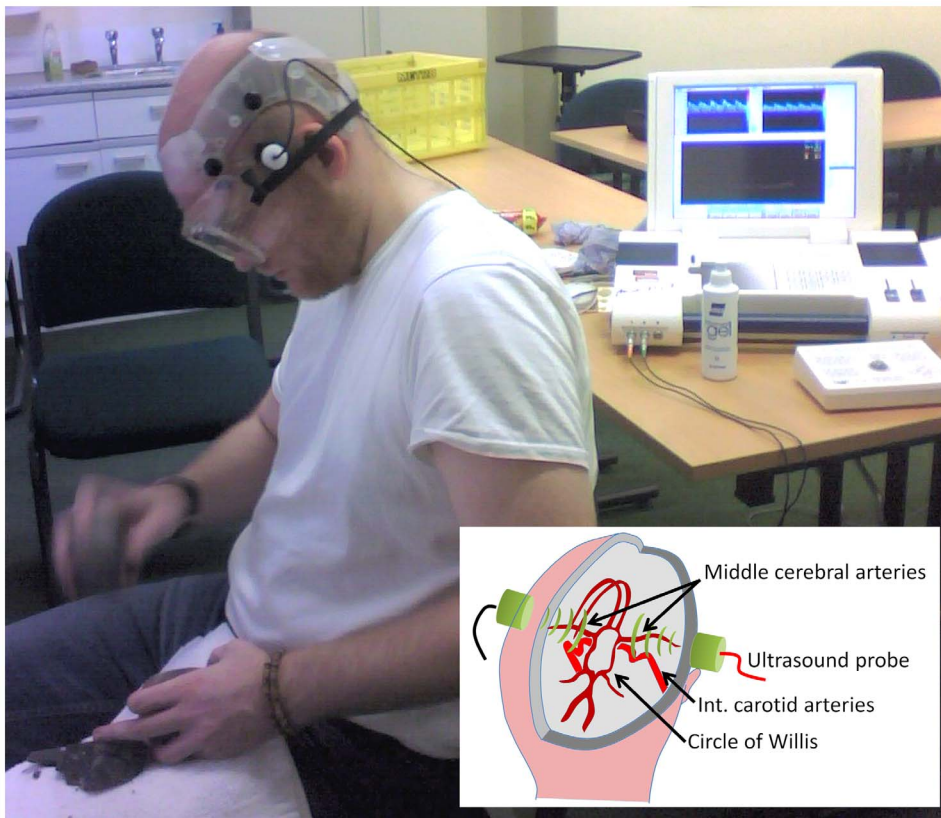

**Figure 3. Stone tools produced in the experiment.** Three handaxes produced by three participants in the experiment. Front, back, and side views are shown for each handaxe. doi:10.1371/journal.pone.0072693.g003

(Eqn.1):

$$\Delta V(t) = dV_{left}(t) - dV_{right}(t), \quad (1)$$

where

$$dV(t) = 100(V(t) - V_b) / V_b$$

is the CBFV change relative to the mean baseline blood flow velocity ( $V_b$ ) recorded over the five seconds preceding the target condition onset.

The lateralization index (LI) represents the peak absolute lateralization value within the activation interval (Eqn. 2):

$$LI = \frac{1}{t_{int}} \int_{t_{max} - 0.5t_{int}}^{t_{max} + 0.5t_{int}} \Delta V(t) dt \quad (2)$$

As integration interval, a time period of  $t_{int} = 2$  s was chosen. A positive value of the LI indicates left hemispheric processing dominance while negative values represent right hemisphere dominance.

## Results

Figures 4A and 4B show the average CBFV changes during task execution in the left (black trace) and right (red trace) MCAs. During the language task (Figure 4A), blood flow in the left hemisphere increases more strongly than on the right. Peak blood flow changes are observed at around 5 s after task onset while the largest lateralization differences are seen after 7 s. Blood flow in the right hemisphere increases slightly faster immediately after the task onset. During the flint knapping task, we observe an initial brief dip in bilateral cerebral blood flow, followed by a relative increase in CBFV in both arteries (Figure 4B). CBFV in the right artery increases more than on the left with a pronounced peak in the average CBFV change around 7 seconds after task onset. After around 12 s, blood flow in the left MCA falls back to close to the baseline rate.

Our fTCD recordings during the language task show a typical lateralization pattern (Figure 5). The direction, magnitude, and time course of CBFV changes as well as LI values reported here are consistent with previously reported data for the same task [28,38,46]. Between 10 s and 20 s after stimulus onset, subjects show an increase in average blood flow towards the left hemisphere (mean  $\Delta V = 2.48\%$ ,  $sd = 2.38\%$ ,  $\Delta V$  range: 1.21–6.29%) preceded by a small initial shift to the right (Figure 5, top trace). In the knapping task, the relative CBFV gradually shifts toward the right hemisphere (mean  $\Delta V = -2.37\%$ ,  $sd = 4.08\%$ ,  $\Delta V$  range:  $-9.33$ – $+4.04\%$ ) over the initial 15 s of analysis (Figure 5, bottom trace). The mean CBFV lateralization during the stone knapping task is to the right hemisphere, consistent with

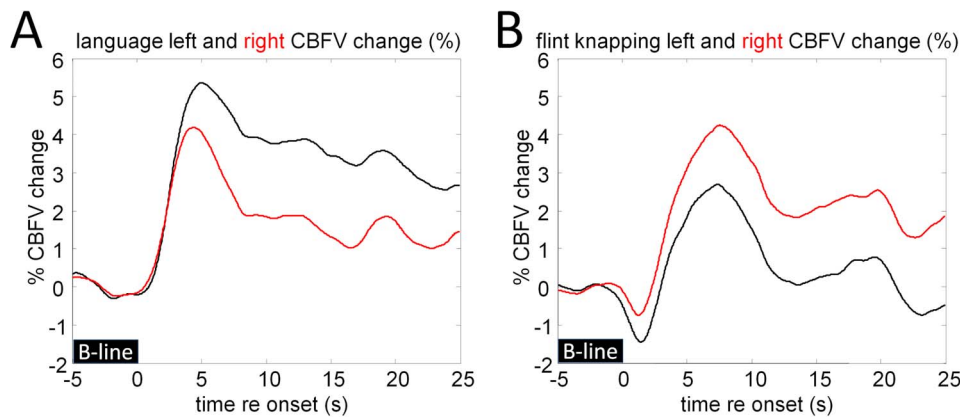

**Figure 4. Bilateral CBFV changes during cued word generation and Acheulean tool-making.** Bilateral CBFV changes were recorded simultaneously in the left (black trace) and right (red) MCAs for the language (A) and knapping (B) tasks. During the language task, blood flow in the left hemisphere increases more strongly than on the right, while the flint knapping task causes blood flow in the right artery to increase more than on the left. Blood flow changes are measured relative to a baseline, marked by a black bar (B-line), covering the mean CBFV over the final 5 seconds before task onset.

doi:10.1371/journal.pone.0072693.g004

previous findings of right dominant activations for experienced participants during stone knapping observation [50].

The main analysis focuses on rapid blood flow changes ( $\Delta V$ ) in order to assess our prediction of correlated blood flow changes for individuals during the initial phases of language and stone knapping. The conventional LI analysis [38] computes individual LI values as the average blood flow lateralization value in a 2-second window that is centered at the peak lateralization value. This means that for two different tasks the LI values can be computed for time windows in very different positions within the hemodynamic response. For the cued word generation and flint knapping tasks we show correlated LIs ( $r = 0.74$ ,  $p = 0.013$ ) in an analysis window between 2 and 18 seconds after task onset. However, for our analysis we imposed a further constraint by correlating only CBFV data from matching time windows in both

responses, in order to test our prediction of a common modulation of hemodynamic responses if shared networks are used for both tasks.

Figure 6, top panel, shows the correlation coefficients for individual averaged CBFV differences ( $\Delta V$ , Eqn. 1), computed over moving 5-second windows starting between 5 s before task onset ( $-5$ ) and 15 s after the task onset. An analysis window of 5 s was chosen to match the time course of metabolic changes as measured with fMRI [51]. We show significantly correlated individual LIs for the two tasks for analysis windows starting between  $-2$  and 7 seconds relative to signal onset ( $p < .05$ ).

Figure 6, bottom panels, show the underlying correlation data for two 5-second windows starting 2 s and 10 s after task onset. The signals for the language and stone knapping tasks are significantly correlated in window A (2–7 s relative to task onset,  $r = 0.86$ ,  $p = 0.0014$ ). The correlation measures decline below the significance threshold for windows starting after approximately 7 s after task onset. At 10 s (window B) the correlation drops to  $r = 0.27$  ( $p = 0.292$ ).

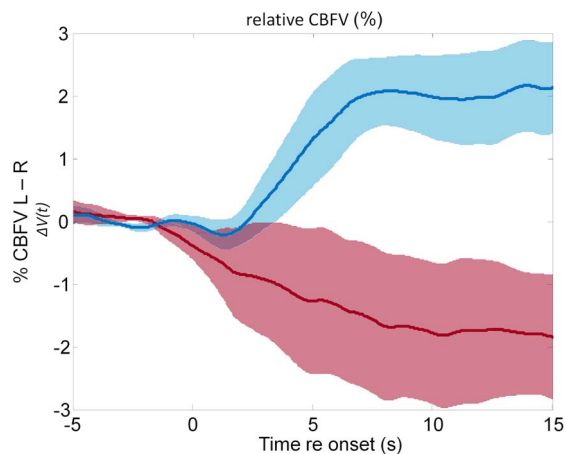

**Figure 5. Brain blood flow volume lateralization changes for cued word generation and Acheulean tool-making.** Raw mean CBFV (cerebral blood flow volume) difference ( $\Delta V$ ) over time during the language and knapping tasks. Positive values indicate a left dominant blood flow lateralization; negative values indicate greater blood flow on the right. The upper line shows the language task; the lower line shows the stone knapping task. The shaded areas show the SEM (standard error of the mean) at each data point.

doi:10.1371/journal.pone.0072693.g005

## Discussion

Our participants showed correlated LIs during the initial 10 seconds after task onset for cued word generation and handaxe production. A number of previous studies have directly correlated LI values (Eqn. 2) for different tasks and shown that tasks which draw on shared neural processing sites, such as the three language tasks described by Bishop et al. [28], result in highly correlated LI measures. In contrast, cognitive tasks that draw on disparate brain areas, such as language and visuo-spatial tasks like driving [46], visual attention [44], or visual memory [45], lead to uncorrelated LIs. Since Acheulean stone knapping is a highly visuo-spatial task [30,35,52], our finding of a correlation between knapping and language requires explanation.

Making an Acheulean handaxe requires both working memory and planning memory [53]. This careful planning is dominant in the initial phase of each experimental block in our study. This action planning draws on brain areas that are shared with language tasks, such as the left-lateralized ventral premotor areas and Broca's area [17,18,50]. Our subject pool shows highly correlated individual brain blood flow lateralization in the early phases of task execution for both tasks. Our findings add empirical

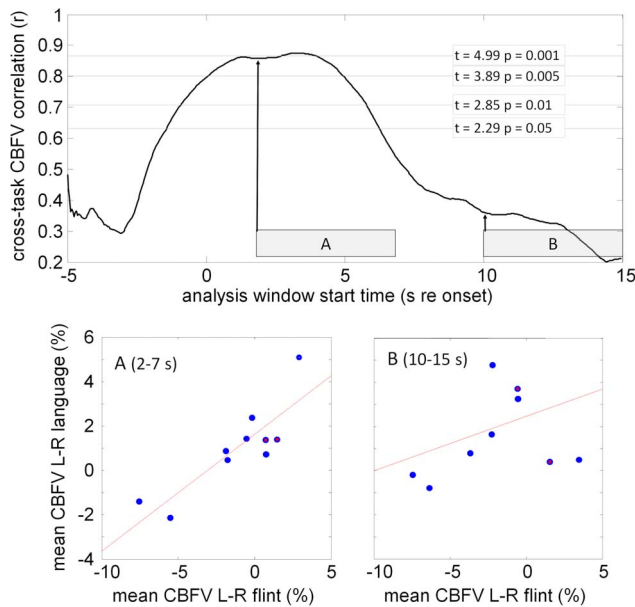

**Figure 6. Correlation analysis of relative brain blood flow volume changes during language and knapping.** The top panel shows the correlation between the mean CBFV differences ( $\Delta V$ ) for both tasks over a moving 5-second analysis windows. The x value represents the delay of the analysis window relative to the interval onset. Horizontal lines show uncorrected significance thresholds for the correlations. Bottom panels show individual subject data; the two left-handed subjects are represented by filled circles. The lines are linear fits. Window A covers 2–7 s after onset. Window B covers 10–15 s after onset.

doi:10.1371/journal.pone.0072693.g006

data to the hypothesis that action planning for tool-making and language draw on shared functional brain structures [54,55]. The correlated time-signatures for Acheulean knapping and language, which remain significantly correlated within subjects despite variability between subjects, indicates that the same brain networks are being activated for both tasks. They suggest that tool-making and language share a basis in more general human capacities for complex, goal-directed action.

The proposal that language and tool-making co-evolved is not new (e.g. [1,9–11,56–58]). Our findings are consistent with language evolution theories that posit a co-evolution of language and manual praxis [8,11,59–64]. Concurrent emergence of gestural and vocal communication would place a greater emphasis on the linkage of hand motor activity with linguistic networks. Among the many explanations for language origins [65], exaptation is one possibility. Co-evolution is another: the network for complex action planning might have emerged in human

## References

- Gibson KR (1993) Tool use, language and social behavior in relationship to information processing capacities. In: Gibson KR, Ingold T, editors. Tools, language and cognition in human evolution. Oxford: Oxford University Press. 251–269.
- Roche H, Delagnes A, Brugal JP, Feibel C, Kibunjia M, et al. (1999) Early hominid stone tool production and technical skill 2.34 Myr ago in West Turkana, Kenya. *Nature* 399: 57–60.
- Semaw S, Renne P, Harris JWK, Feibel CS, Bernor RL, et al. (1997) 2.5-million-year-old stone tools from Gona, Ethiopia. *Nature* 385: 333–336.
- McPherron SP, Alemseged Z, Marean CW, Wynn JG, Reed D, et al. (2010) Evidence for stone-tool-assisted consumption of animal tissues before 3.39 million years ago at Dikika, Ethiopia. *Nature* 466: 857–860.
- Belfer-Cohen A, Goren-Inbar N (1994) Cognition and communication in the Levantine Lower Palaeolithic. *World Archaeology* 26: 144–157.
- Coolidge FL, Wynn T (2005) Working memory, its executive functions, and the emergence of modern thinking. *Cambridge Archaeological Journal* 15: 5–26.
- Normile D (2012) Experiments Probe Language's Origins and Development. *Science* 336: 408–411.
- Steele J, Uomini N (2009) Can the archaeology of manual specialization tell us anything about language evolution? A survey of the state of play. *Cambridge Archaeological Journal* 19: 97–110.
- Holloway RL Jr (1969) Culture: a human domain. *Current Anthropology*: 395–412.
- Greenfield PM (1991) Language, tools and brain: the ontogeny and phylogeny of hierarchically organized sequential behavior. *Behavioral & Brain Sciences* 14: 531–595.
- Corballis MC (2002) From hand to mouth: The origins of language. Princeton: Princeton University Press.

evolution as part of our brain size increase and reorganization [66], leading to both language and tool-making [1,23,57,58,61,67–69]. We suggest the start of the Acheulean techno-complex at 1.75 million years ago [70] as a likely candidate for this because Acheulean knapping required more complex action planning than Oldowan technologies [14,15,31,32,50]. While the motor and visuo-spatial skills are the same for Oldowan and Acheulean knapping, these techno-complexes differ in the sequencing and hierarchical organization of the knapping gestures required [9,10,53,71–74].

Whether the Acheulean techno-complex or language emerged first, or whether they emerged in parallel, cannot be resolved yet. However, following Tim Wakeford (pers. comm.), we propose that a co-emergence could explain the rapid and wide spread of the Acheulean, possibly due to improved teaching and learning of the knowledge and know-how for complex stone tool production facilitated by aspects of language [5,30,53,62,72,75–78]. The Acheulean is remarkable for its combination of cultural conservatism *and* variability [79–84]. The social transmission of complex core reduction strategies used by hominins throughout the Acheulean world indicates that imitation and shared intentionality were already in place [85]. These could have been facilitated by proto-speech, proto-sign, or multimodal communication [86–88]. Future work should focus on specifying the extent of the potential left-hemisphere action-planning network, and on developing ways to neuroimage stone tool-making in real-time using techniques with good temporal and spatial resolution. Only after we can further dissect the temporal and spatial scales of action in stone knapping will we truly be able to make direct comparisons with language.

## Supporting Information

**Video S1 Video recording showing one participant knapping during the fTCD recording.** The equipment is visible in the background. (WMV)

## Acknowledgments

Thanks to Suzie Higginbotham for assisting in running the experiment, to the Lithic Studies Society, and to all the subjects for their participation. We are grateful to Andy Shuttleworth and Adam Newton for the knapping images, and to Tim Wakeford for ideas. The raw data are available from G.Meyer. We would like to thank Dietrich Stout and Ceri Shtipton for their constructive comments as reviewers of this paper.

## Author Contributions

Conceived and designed the experiments: GM NU. Performed the experiments: GM NU. Analyzed the data: GM. Contributed reagents/materials/analysis tools: GM NU. Wrote the paper: NU GM.

12. Wynn T (1991) Tools, grammar and the archaeology of cognition. *Cambridge Archaeological Journal* 1: 191–206.
13. Stout D (2011) Stone toolmaking and the evolution of human culture and cognition. *Philosophical Transactions of the Royal Society B: Biological Sciences* 366: 1050–1059.
14. Isaac G (1976) Stages of cultural elaboration in the Pleistocene: possible archaeological indicators of the development of language capabilities. In: Harnad S, Steklis HD, Lancaster J, editors. *Origins and Evolution of Language and Speech*. *Annals of the New York Academy of Sciences* 280: 275–288.
15. Gowlett JAJ (1979) Complexities of cultural evidence in the Lower and Middle Pleistocene. *Nature* 278: 14–17.
16. Meador KJ, Loring DW, Lee K, Hughes M, Lee G, et al. (1999) Cerebral lateralization: Relationship of language and ideomotor praxis. *Neurology* 53: 2028–2031.
17. Johnson-Frey SH (2004) The neural bases of complex tool use in humans. *TRENDS in Cognitive Sciences* 8: 71–78.
18. Frey SH (2008) Tool use, communicative gesture and cerebral asymmetries in the modern human brain. *Philosophical Transactions of the Royal Society B: Biological Sciences* 363: 1951–1957.
19. Bookheimer S (2002) Functional MRI of language: new approaches to understanding the cortical organization of semantic processing. *Annual Review of Neuroscience* 25: 151–188.
20. Meyer GF, Greenlee M, Wuerger S (2011) Interactions between auditory and visual semantic stimulus classes: evidence for common processing networks for speech and body actions. *Journal of Cognitive Neuroscience* 23: 2291–2308.
21. Cattaneo L, Rizzolatti G (2009) The mirror neuron system. *Archives of Neurology* 66: 557–560.
22. Higuchi S, Chaminade T, Imamizu H, Kawato M (2009) Shared neural correlates for language and tool use in Broca's area. *Neuroreport* 20: 1376–1381.
23. Stout D, Chaminade T (2012) Stone tools, language and the brain in human evolution. *Philosophical Transactions of the Royal Society B: Biological Sciences* 367: 75–87.
24. Meyer GF, Harrison NR, Wuerger SM (2013) The time course of auditory-visual processing of speech and body actions: Evidence for the simultaneous activation of an extended neural network for semantic processing. *Neuropsychologia* 51: 1716–1725.
25. Królczyk G, Frey SH (2009) A common network in the left cerebral hemisphere represents planning of tool use pantomimes and familiar intransitive gestures at the hand-independent level. *Cerebral Cortex* 19: 2396–2410.
26. Somers M, Neggers SF, Diederer KM, Boks MP, Kahn RS, et al. (2011) The measurement of language lateralization with functional transcranial Doppler and functional MRI: a critical evaluation. *Frontiers in Human Neuroscience* 5: article 31.
27. Knecht S, Deppe M, Dräger B, Bobe L, Lohmann H, et al. (2000) Language lateralization in healthy right-handers. *Brain* 123: 74–81.
28. Bishop DVM, Watt H, Papadatou-Pastou M (2009) An efficient and reliable method for measuring cerebral lateralization during speech with functional transcranial Doppler ultrasound. *Neuropsychologia* 47: 587–590.
29. Birn RM, Kenworthy L, Case L, Caravella R, Jones TB, et al. (2010) Neural systems supporting lexical search guided by letter and semantic category cues: a self-paced overt response fMRI study of verbal fluency. *Neuroimage* 49: 1099–1107.
30. Gowlett J (2006) The elements of design form in Acheulian bifaces: modes, modalities, rules and language. In: Goren-Inbar N, Sharon G, editors. *Axe Age: Acheulian Tool-Making from Quarry to Discard*. London: Equinox. 203–221.
31. Gowlett JAJ (2011) The Empire of the Acheulean strikes back. In: Sept J, Pilbeam D, editors. *Casting the net wide: Papers in honor of Glynn Isaac and his approach to human origins research*. Oxford: Oxbow Books. 93–114.
32. Wynn T (2002) Archaeology and cognitive evolution. *Behavioral & Brain Sciences* 25: 389–438.
33. Deppe M, Ringelstein EB, Knecht S (2004) The investigation of functional brain lateralization by transcranial Doppler sonography. *Neuroimage* 21: 1124–1146.
34. Beevor CE (1908) The cerebral arterial supply. *Brain* 30: 403–425.
35. Stout D, Toth N, Schick K, Stout J, Hutchins G (2000) Stone tool-making and brain activation: Positron emission tomography (PET) studies. *Journal of Archaeological Science* 27: 1215–1223.
36. Knecht S, Deppe M, Ringelstein EB, Wirtz M, Lohmann H, et al. (1998) Reproducibility of functional transcranial Doppler sonography in determining hemispheric language lateralization. *Stroke* 29: 1155–1159.
37. Stroobant N, Vingerhoets G (2001) Test-retest reliability of functional transcranial Doppler ultrasonography. *Ultrasound in Medicine & Biology* 27: 509–514.
38. Deppe M, Knecht S, Papke K, Lohmann H, Fleischer H, et al. (2000) Assessment of Hemispheric Language Lateralization: A Comparison Between fMRI and fTCD. *Journal of Cerebral Blood Flow & Metabolism* 20: 263–268.
39. Jansen A, Flöel A, Deppe M, van Randenborgh J, Dräger B, et al. (2004) Determining the hemispheric dominance of spatial attention: A comparison between fTCD and fMRI. *Human Brain Mapping* 23: 168–180.
40. Jansen A, Menke R, Sommer J, Förster AF, Bruchmann S, et al. (2006) The assessment of hemispheric lateralization in functional MRI—Robustness and reproducibility. *NeuroImage* 33: 204–217.
41. Sabri O, Owega A, Schreckenberger M, Sturz L, Fimm B, et al. (2003) A truly simultaneous combination of functional transcranial Doppler sonography and H215O PET adds fundamental new information on differences in cognitive activation between schizophrenics and healthy control subjects. *Journal of Nuclear Medicine* 44: 671–681.
42. Knecht S, Deppe M, Ebner A, Henningsen H, Huber T, et al. (1998) Noninvasive Determination of Language Lateralization by Functional Transcranial Doppler Sonography: A Comparison With the Wada Test. *Stroke* 29: 82–86.
43. Flöel A, Knecht S, Lohmann H, Sommer J, Deppe M, et al. (2000) Combined assessment of language lateralization by activation and inactivation using functional Transcranial Doppler Ultrasonography (fTCD) and repetitive Transcranial Magnetic Stimulation (rTMS). *NeuroImage* 11: S276.
44. Rosch RE, Bishop DVM, Badcock NA (2012) Lateralised visual attention is unrelated to language lateralisation, and not influenced by task difficulty—a functional transcranial Doppler study. *Neuropsychologia* 50: 810–815.
45. Whitehouse AJ, Badcock N, Groen MA, Bishop DV (2009) Reliability of a novel paradigm for determining hemispheric lateralization of visuospatial function. *Journal of the International Neuropsychological Society* 15: 1028–1032.
46. Lust JM, Geuze RH, Groothuis AGG, van der Zwan JE, Brouwer WH, et al. (2011) Driving performance during word generation—Testing the function of human brain lateralization using fTCD in an ecologically relevant context. *Neuropsychologia* 49: 2375–2383.
47. Schuepbach D, Boeker H, Duschek S, Hell D (2007) Rapid cerebral hemodynamic modulation during mental planning and movement execution: Evidence of time-locked relationship with complex behavior. *Clinical Neurophysiology* 118: 2254–2262.
48. Ringelstein EB, Kahlscheuer B, Niggemeyer E, Otis SM (1990) Transcranial doppler sonography: Anatomical landmarks and normal velocity values. *Ultrasound in Medicine & Biology* 16: 745–761.
49. Deppe M, Knecht S, Henningsen H, Ringelstein EB (1997) AVERAGE: a Windows® program for automated analysis of event related cerebral blood flow. *Journal of Neuroscience Methods* 75: 147–154.
50. Stout D, Toth N, Schick K, Chaminade T (2008) Neural correlates of Early Stone Age toolmaking: technology, language and cognition in human evolution. *Philosophical Transactions of the Royal Society B: Biological Sciences* 363: 1939–1949.
51. Glover G (1999) Deconvolution of impulse response in event-related BOLD fMRI. *NeuroImage* 9: 416–429.
52. Hodgson D, McNabb J (2005) More on Acheulean tools. *Current Anthropology* 46: 647–650.
53. Goren-Inbar N (2011) Culture and cognition in the Acheulian industry: a case study from Gesher Benot Ya'aqov. *Philosophical Transactions of the Royal Society B: Biological Sciences* 366: 1038–1049.
54. Stout D, Chaminade T (2007) The evolutionary neuroscience of tool making. *Neuropsychologia* 45: 1091–1100.
55. Johnson-Frey SH, Newman-Norlund R, Grafton ST (2005) A distributed left hemisphere network active during planning of everyday tool use skills. *Cerebral Cortex* 15: 681–695.
56. Darwin C (2004 [1871]) *The descent of man, and selection in relation to sex*. London: Penguin Classics.
57. Hewes GW (1973) Primate communication and the gestural origin of language. *Current Anthropology* 14: 5–24.
58. Bradshaw JL, Nettleton NC (1982) Language lateralization to the dominant hemisphere: tool use, gesture and language in hominid evolution. *Current Psychological Reviews* 10: 171–192.
59. Steele J, Quinlan A, Wenban-Smith FF (1995) Stone tools and the linguistic capabilities of earlier hominids. *Cambridge Archaeological Journal* 5: 245–256.
60. Steele J, Uomini NT (2005) Humans, tools and handedness. In: Roux V, Bril B, editors. *Stone Knapping: The Necessary Conditions for a Uniquely Hominin Behaviour*. Cambridge, UK: McDonald Institute for Archaeological Research. 217–239.
61. Uomini N (2009) Prehistoric left-handers and prehistoric language. In: de Beaune S, Coolidge F, editors. *The Emergence of Cognitive Abilities: The Contribution of Neuropsychology to Archaeology*. Cambridge: Cambridge University Press. 37–55.
62. Uomini NT (2009) The prehistory of handedness: Archaeological data and comparative ethology. *Journal of Human Evolution* 57: 411–419.
63. Vaesen K (2012) The cognitive bases of human tool use. *Behavioral & Brain Sciences* 35: 203–262.
64. Aiello LC (1998) The foundation of human language. In: Jablonski NG, Aiello LC, editors. *The Origin and Diversification of Language*. San Francisco: California Academy of Science. 21–34.
65. Tallerman M, Gibson KR (2011) *The Oxford Handbook of Language Evolution*. Oxford: Oxford University Press.
66. Bruner E (2010) The evolution of the parietal cortical areas in the human genus: between structure and cognition. In: Broadfield D, Yuan M, Schick K, Toth N, editors. *Human Brain Evolving*. Bloomington, IN: The Stone Age Institute. 83–96.
67. Sterelny K (2012) Language, gesture, skill: the co-evolutionary foundations of language. *Philosophical Transactions of the Royal Society B: Biological Sciences* 367: 2141–2151.
68. Forrester G, Quresmi C (2013) The Right Hand Man: Manual Laterality and Language. In: Csermely D, Regolin L, editors. *Behavioral Lateralization in Vertebrates*. Heidelberg: Springer. 125–141.



69. Bradshaw JL (1988) The evolution of human lateral asymmetries: new evidence and second thoughts. *Journal of Human Evolution* 17: 615–637.
70. Beyene Y, Katoh S, WoldeGabriel G, Hart WK, Uto K, et al. (2013) The characteristics and chronology of the earliest Acheulean at Konso, Ethiopia. *Proceedings of the National Academy of Sciences* 110: 1584–1591.
71. Frost G (1980) Tool behavior and the origins of laterality. *Journal of Human Evolution* 9: 447–459.
72. Stout D, Chaminade T (2009) Making Tools and Making Sense: Complex, Intentional Behaviour in Human Evolution. *Cambridge Archaeological Journal* 19: 85–96.
73. Matsuzawa T (2008) Primate foundations of human intelligence. In: Matsuzawa T, editor. *Primate Origins of Human Cognition and Behavior*. Tokyo: Springer. 3–25.
74. Faisal A, Stout D, Apel J, Bradley B (2010) The Manipulative Complexity of Lower Paleolithic Stone Toolmaking. *PLoS ONE* 5: e13718.
75. Gowlett JAJ (1984) Mental abilities of early man: a look at some hard evidence. In: Foley RA, editor. *Hominid Evolution and Community Ecology*. New York: Academic Press. 167–192.
76. Toth N, Schick K (1993) Early stone industries and inferences regarding language and cognition. In: Gibson KR, Ingold T, editors. *Tools, language and cognition in human evolution*. Oxford: Oxford University Press. 346–362.
77. Powell A, Shennan S, Thomas MG (2009) Late Pleistocene Demography and the Appearance of Modern Human Behavior. *Science* 324: 1298–1301.
78. Kempe M, Lycett S, Mesoudi A (2012) An Experimental Test of the Accumulated Copying Error Model of Cultural Mutation for Acheulean Handaxe Size. *PLoS ONE* 7: e48333.
79. Kleindienst MR (1961) Variability within the Late Acheulean assemblage in Eastern Africa. *The South African Archaeological Bulletin* 16: 35–52.
80. Gowlett J (1986) Culture and conceptualisation: the Oldowan - Acheulean gradient. In: Bailey G, Callow P, editors. *Stone Age Prehistory: Studies in Memory of Charles McBurney*. Cambridge: Cambridge University Press. 243–260.
81. Sharon G (2007) Acheulean Large Flake Industries: Technology, Chronology, and Significance. *BAR International Series* 1701. Oxford: Archaeopress.
82. Sharon G, Alperson-Afil N, Goren-Inbar N (2011) Cultural conservatism and variability in the Acheulean sequence of Gesher Benot Ya'aqov. *Journal of Human Evolution* 60: 387–397.
83. Lycett SJ, Gowlett JAJ (2008) On questions surrounding the Acheulean 'tradition'. *World Archaeology* 40: 295–315.
84. Shipton C, Petraglia M (2010) Inter-continental variation in Acheulean bifaces. In: Norton C, Braun R, editors. *Asian Palaeoanthropology*. London: Springer. 49–56.
85. Shipton C (2010) Imitation and shared intentionality in the Acheulean. *Cambridge Archaeological Journal* 20: 197–210.
86. Arbib MA, Liebal K, Pika S (2008) Primate Vocalization, Gesture, and the Evolution of Human Language. *Current Anthropology* 49: 1053–1076.
87. Hobaiter C (2011) Multi-modal communication in wild chimpanzees: the integration of gesture and vocalizations (invited talk). Paris, CNRS, 13 Dec 2011.
88. Corballis MC (2012) How language evolved from manual gestures. *Gesture* 12: 200–226.
